## CORRECTION

# Correction: Effect of status disclosure on quality of life among people living with HIV/AIDS in Ghana: A health facility-based cross-sectional study

The *PLOS Mental Health* Staff

## Notice of Republication

This article was republished on 21<sup>st</sup> February 2025, to correct errors within the author list that were introduced during the typesetting process.

The fifth author's name is spelled incorrectly. The correct name is: Luchuo Engelbert Bain.

The publisher apologizes for the errors. Please download this article again to view the correct version. The originally published, uncorrected article and the republished, corrected articles are provided here for reference.

## Supporting information

**S1 File. Originally published, uncorrected article.**

(PDF)

**S2 File. Republished, corrected article.**

(PDF)

## Reference

1. Saah FI, Aidam K, Seidu A-A, Amu H, Bain LE. Effect of status disclosure on quality of life among people living with HIV/AIDS in Ghana: A health facility-based cross-sectional study. *PLOS Ment Health*. 2024;1(1): e0000060. <https://doi.org/10.1371/journal.pmen.0000060>

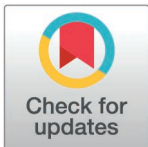

---

## OPEN ACCESS

**Citation:** The *PLOS Mental Health* Staff (2025) Correction: Effect of status disclosure on quality of life among people living with HIV/AIDS in Ghana: A health facility-based cross-sectional study. *PLOS Ment Health* 2(3): e0000290. <https://doi.org/10.1371/journal.pmen.0000290>

**Published:** March 25, 2025

**Copyright:** © 2025 The *PLOS Mental Health* Staff. This is an open access article distributed under the terms of the [Creative Commons Attribution License](https://creativecommons.org/licenses/by/4.0/), which permits unrestricted use, distribution, and reproduction in any medium, provided the original author and source are credited.
